# Supplementary material for: Selective single crystal complexation of l- or d-leucine by p-sulfonatocalix[6]arene
Source: Royal Society of Chemistry journal article supplement (doi:10.1039/b413821j), 2004-12-13
Supplement: b413821j.pdf [file b413821j.pdf]

**Structural data for L-leucine hydrochloride monohydrate:**

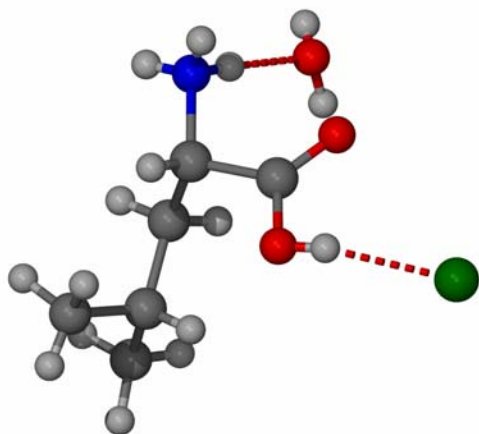

**Figure 1.** Ball and stick representation of the asymmetric unit found in the crystal structure of L-leucine hydrochloride monohydrate showing hydrogen bonding between the structural components.

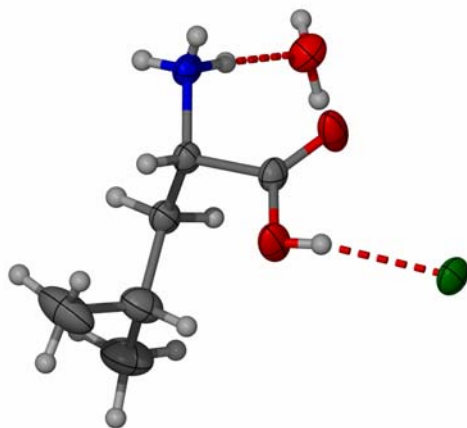

**Figure 2.** The asymmetric unit found in the crystal structure of L-leucine hydrochloride monohydrate, anisotropic displacement parameters shown at the 50% level. Hydrogen bonding between structural components is also shown.

**Table 1.** Crystal data and structure refinement for L-leucine hydrochloride monohydrate.

|                                |                                                   |                     |
|--------------------------------|---------------------------------------------------|---------------------|
| Identification code            | L-Leucine hydrochloride monohydrate               |                     |
| Formula                        | C <sub>6</sub> H <sub>16</sub> ClNO <sub>3</sub>  |                     |
| Formula weight                 | 185.65                                            |                     |
| Size                           | 0.46 x 0.18 x 0.08 mm                             |                     |
| Crystal morphology             | Colourless plate                                  |                     |
| Temperature                    | 150(2) K                                          |                     |
| Wavelength                     | 0.71073 Å [Mo-K <sub>α</sub> ]                    |                     |
| Crystal system                 | Orthorhombic                                      |                     |
| Space group                    | P2 <sub>1</sub> 2 <sub>1</sub> 2 <sub>1</sub>     |                     |
| Unit cell dimensions           | $a = 6.2563(13) \text{ \AA}$                      | $\alpha = 90^\circ$ |
|                                | $b = 6.3951(13) \text{ \AA}$                      | $\beta = 90^\circ$  |
|                                | $c = 26.865(5) \text{ \AA}$                       | $\gamma = 90^\circ$ |
| Volume                         | 1074.9(4) Å <sup>3</sup>                          |                     |
| Z                              | 4                                                 |                     |
| Density (calculated)           | 1.147 Mg/m <sup>3</sup>                           |                     |
| Absorption coefficient         | 0.325 mm <sup>-1</sup>                            |                     |
| F(000)                         | 400                                               |                     |
| Data collection range          | 3.34 ≤ θ ≤ 27.5°                                  |                     |
| Index ranges                   | -8 ≤ h ≤ 4, -7 ≤ k ≤ 4, -11 ≤ l ≤ 33              |                     |
| Reflections collected          | 1746                                              |                     |
| Independent reflections        | 1473 [R(int) = 0.0678]                            |                     |
| Observed reflections           | 1299 [I > 2σ(I)]                                  |                     |
| Absorption correction          | multi-scan                                        |                     |
| Max. and min. transmission     | 0.949 and 0.104                                   |                     |
| Refinement method              | Full                                              |                     |
| Data / restraints / parameters | 1473 / 0 / 164                                    |                     |
| Goodness of fit                | 1.033                                             |                     |
| Final R indices [I > 2σ(I)]    | R <sub>1</sub> = 0.0343, wR <sub>2</sub> = 0.0777 |                     |
| R indices (all data)           | R <sub>1</sub> = 0.0418, wR <sub>2</sub> = 0.0818 |                     |

Supplementary Material (ESI) for Chemical Communications  
This journal is © The Royal Society of Chemistry 2005

|                              |                                   |
|------------------------------|-----------------------------------|
| Largest diff. peak and hole  | 0.159 and -0.167e.Å <sup>-3</sup> |
| Absolute structure parameter | -0.01(9)                          |
